# Supplementary material
Source: PubMed Central journal article supplement (PMC4356752)
Supplement: AAC.04641-14_zac004153817so1.pdf [file AAC.04641-14_zac004153817so1.pdf]

Figure S1. Phage lysin domain organization in *Acinetobacter baumannii*

1. TIGR02594

**PlyF376**

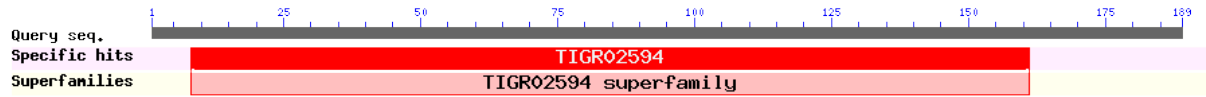

**PlyF340**

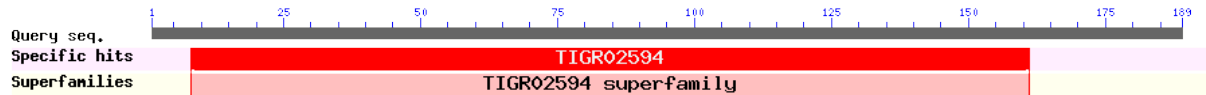

2. No domain – TIGR02594

**PlyF330**

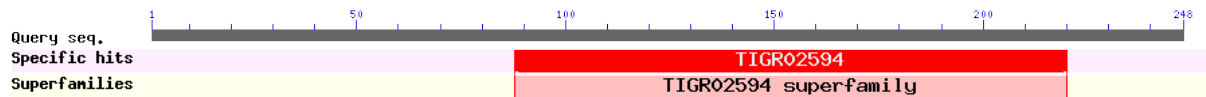

**PlyF334**

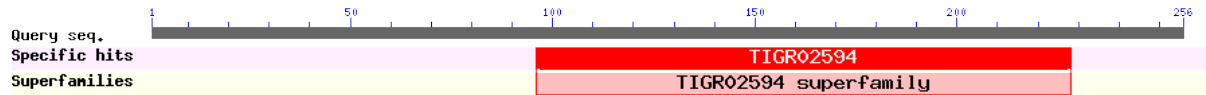

**PlyF338**

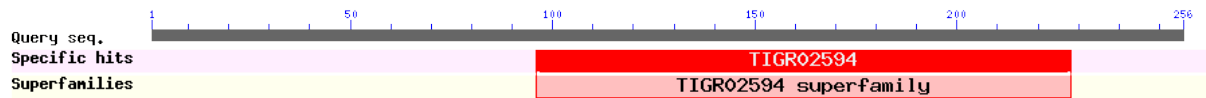

**PlyF336**

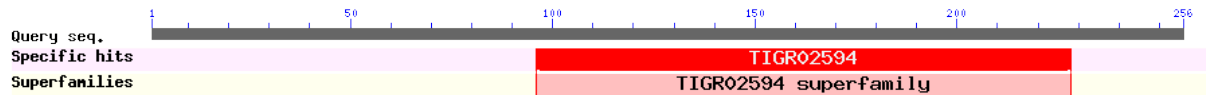

**PlyF332**

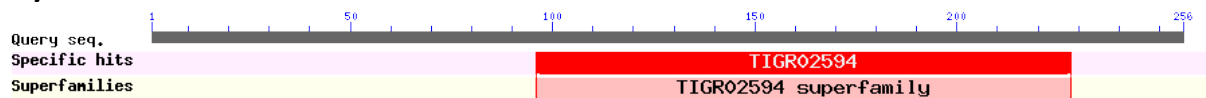

### 3. Glycosyl hydrolase family 108 – Peptidoglycan Binding Domain

#### PlyF344

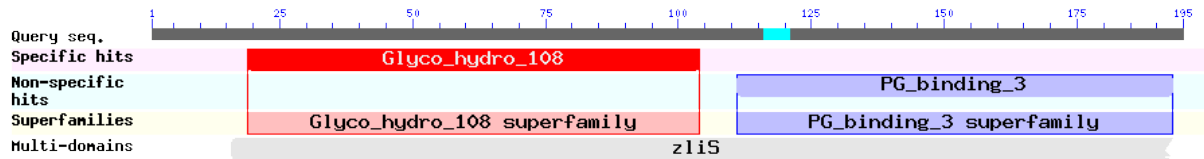

#### PlyF351

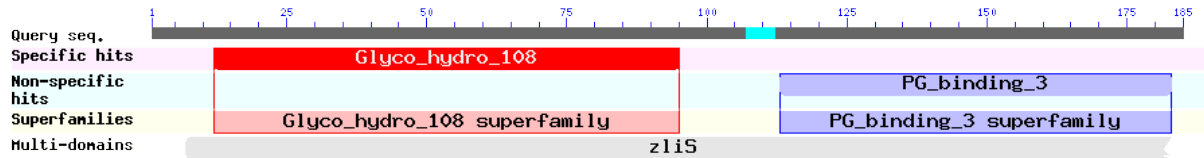

#### PlyF309

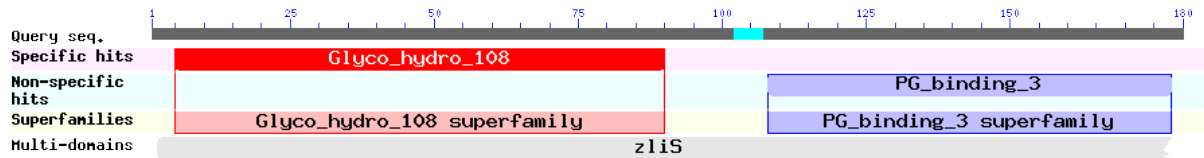

#### PlyF320

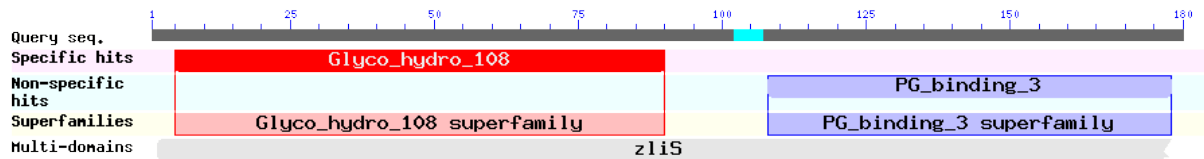

#### PlyF303



#### PlyF328



#### PlyF324

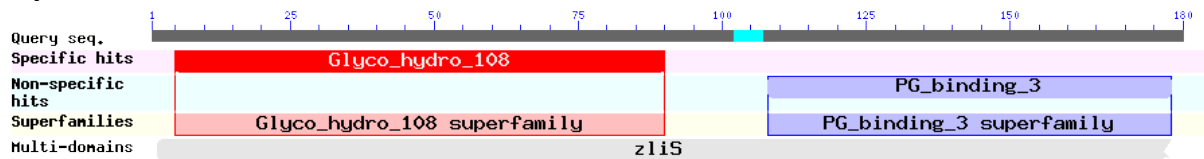

### PlyF321

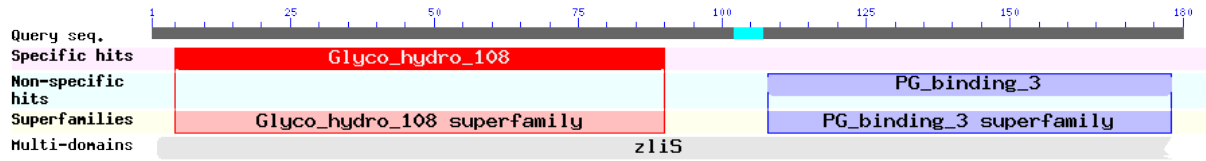

### PlyF301

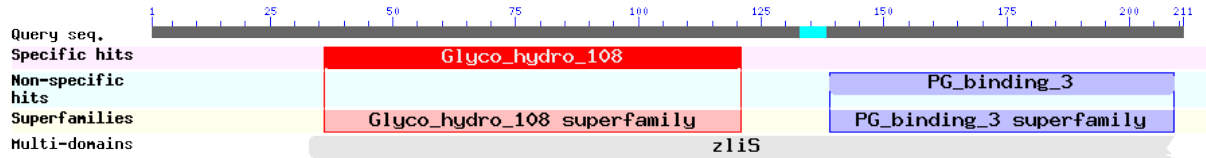

## 4. Lysozyme domain followed by a short C-terminal part

### PlyF311

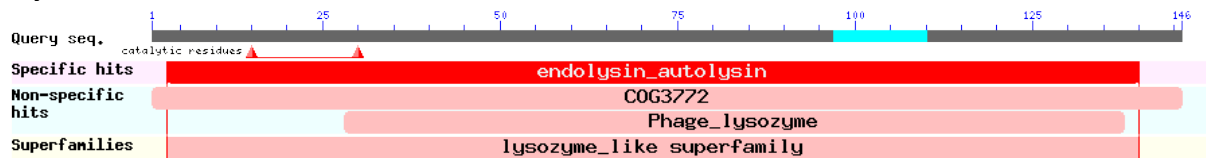

### PlyF307

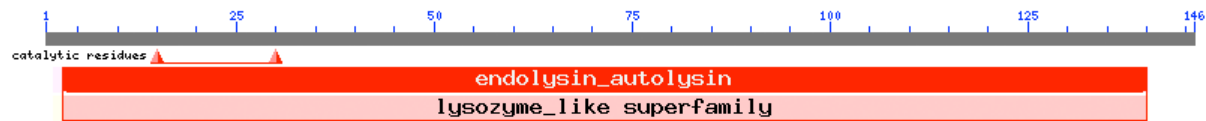

## 5. Phage lysozyme with C- and N-terminal parts

### PlyF347

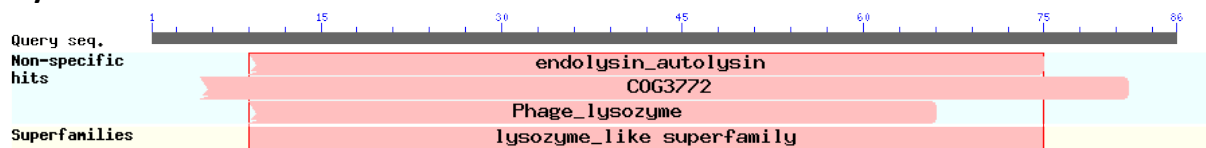

### PlyF315

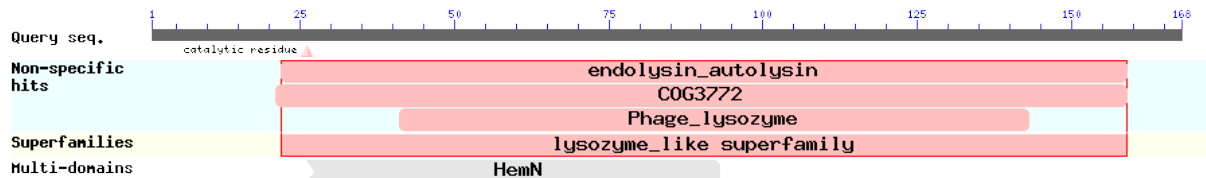

### PlyF306

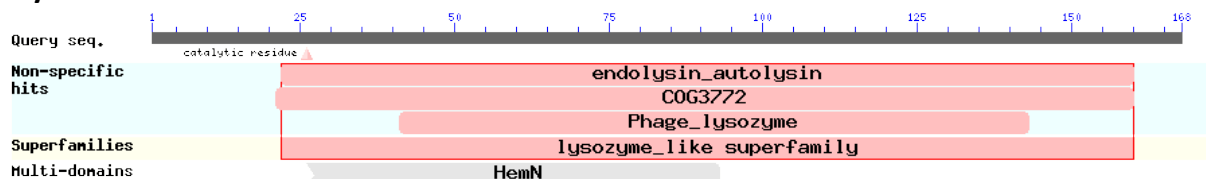

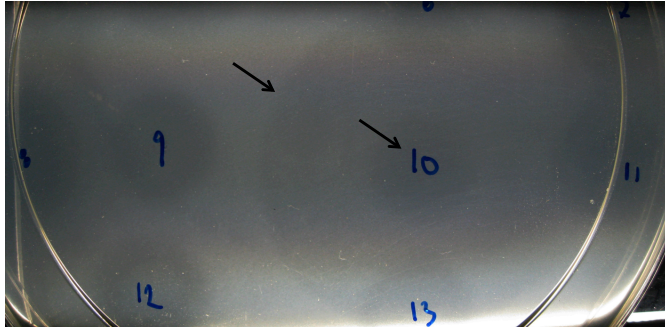

**Figure S2. Example of lysis of live *A. baumannii* on plates by addition of lysins (crude lysates).** A small drop (10  $\mu$ l) of crude lysates was added to a TSB plate containing a top agar layer with live *A. baumannii*. Lysate #10 (PlyF307) generates a local clearing zone at the site of the initial spot, as well as a surrounding halo, as marked by the arrows.

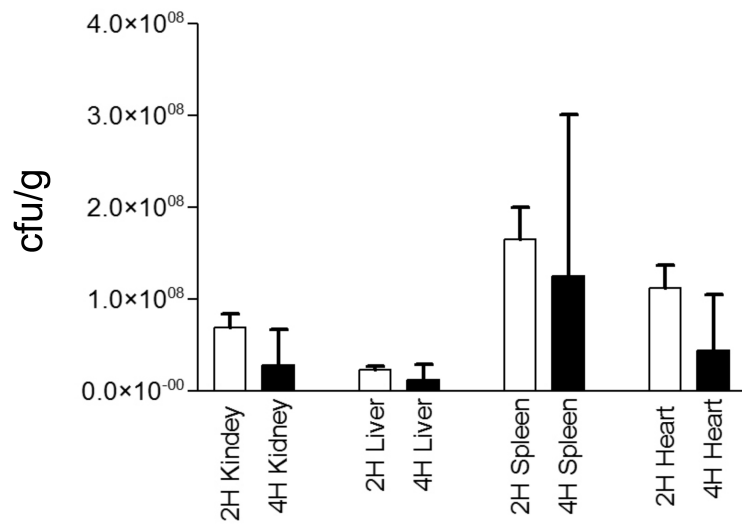

**Figure S3. Systemic infection of mice with *A. baumannii*.** Mice were infected i.p. with  $10^8$  cfu *A. baumannii*. Mice were dissected two and four hours after infection, and organs analyzed for the presence of *A. baumannii* through plating of bacteria.
